# Supplementary material for: Purinergic neurotransmission receptor P2X4 silencing alleviates intracerebral hemorrhage-induced neuroinflammation by blocking the NLRP1/Caspase-1 pathway
Source: PubMed Central journal article supplement (PMC10471699; doi:10.1038/s41598-023-40748-8), 2023-08-31

ASC

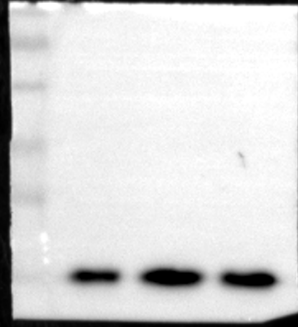

caspase-1

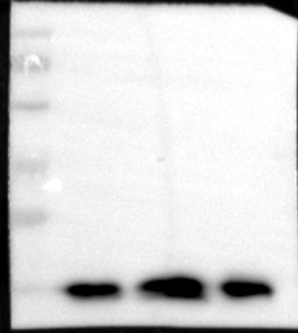

NLRP1

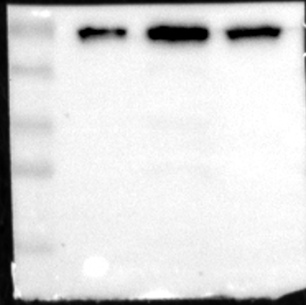

pro-caspase-1

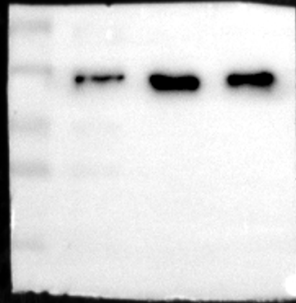

$\beta$ -Actin

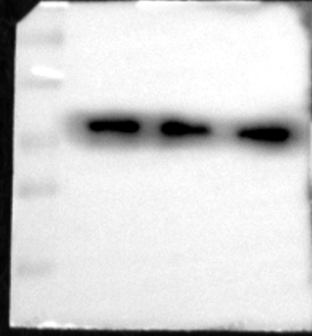

Supplement: 41598_2023_40748_MOESM2_ESM.pdf [file 41598_2023_40748_MOESM2_ESM.pdf]
